# Supplementary material for: Ovarian and Breast Cancer Spheres Are Similar in Transcriptomic Features and Sensitive to Fenretinide
Source: Biomed Res Int. 2013 Oct 8;2013:510905. doi: 10.1155/2013/510905 (PMC3816214; doi:10.1155/2013/510905)
Supplement: Supplementary file 1 — Total RNA from A2780, MCF7, and SUM159 parental and sphere cells was amplified and labeled with biotin according to the standard Affymetrix® protocol. The fragmented, biotinylated cDNA was then subjected to hybridization with the GeneChip® Human Genome-U133 Plus 2.0 array (Affymetrix, Santa Clara, CA). DAVID Bioinformatics Resources analyses of biological themes were performed to explore the underlying themes of those statistically significant differentially expressed genes in terms of biological relevance, e.g., functional relevance as revealed by Gene Ontology (GO) enrichment analysis and regulatory relevance as revealed by UCSC conserved transcription factor binding site (TFBS) enrichment analysis. The Benjamini-Hochberg derived step-up procedure of False Discovery Rate (FDR) was applied to account for multiple hypothesis testing, thus to assess the significance of the biological theme enrichments. The transcriptome profilings of A2780, MCF7, and SUM159 parental and sphere cells are available at GEO accession GSE43657. Table S1.The common regulated genes in A2780, MCF7 and SUM159 spheres cells. Table S2. The enriched transcription factors from the changed genes in A2780 spheres cells. Table S3. The enriched transcription factors from the changed genes in MCF7 spheres cells. Table S4. The enriched transcription factors from the changed genes in SUM159 spheres cells. [file 510905.f1.zip]

Archive with 5 entries (4 files):
- 510905.f1/
- 510905.f1/Table S1.xls
- 510905.f1/Table S2.xls
- 510905.f1/Table S3.xls
- 510905.f1/Table S4.xls
