# Supplementary material for: Ovarian and Breast Cancer Spheres Are Similar in Transcriptomic Features and Sensitive to Fenretinide
Source: Biomed Res Int. 2013 Oct 8;2013:510905. doi: 10.1155/2013/510905 (PMC3816214; doi:10.1155/2013/510905)
Supplement: Supplementary file 1 — Total RNA from A2780, MCF7, and SUM159 parental and sphere cells was amplified and labeled with biotin according to the standard Affymetrix® protocol. The fragmented, biotinylated cDNA was then subjected to hybridization with the GeneChip® Human Genome-U133 Plus 2.0 array (Affymetrix, Santa Clara, CA). DAVID Bioinformatics Resources analyses of biological themes were performed to explore the underlying themes of those statistically significant differentially expressed genes in terms of biological relevance, e.g., functional relevance as revealed by Gene Ontology (GO) enrichment analysis and regulatory relevance as revealed by UCSC conserved transcription factor binding site (TFBS) enrichment analysis. The Benjamini-Hochberg derived step-up procedure of False Discovery Rate (FDR) was applied to account for multiple hypothesis testing, thus to assess the significance of the biological theme enrichments. The transcriptome profilings of A2780, MCF7, and SUM159 parental and sphere cells are available at GEO accession GSE43657. Table S1.The common regulated genes in A2780, MCF7 and SUM159 spheres cells. Table S2. The enriched transcription factors from the changed genes in A2780 spheres cells. Table S3. The enriched transcription factors from the changed genes in MCF7 spheres cells. Table S4. The enriched transcription factors from the changed genes in SUM159 spheres cells. [file 510905.f1.zip › 510905.f1/Table S1.xls]

## Sheet: Sheet1
Table S1.The common regulated genes in A2780, MCF7 and SUM159 spheres cells
GeneID	GeneSymbol	A2780_sp	MCF7_sp	SUM159_sp
27127	SMC1B	-1.9146	-3.59003	-2.35309
202459	LOC202459	-1.7919	-1.28326	-1.94308
642587	LOC642587	-2.34393	-2.64219	-1.30032
728606	hCG_38480	-2.24629	-3.99061	-1.26782
165057	FLJ39061	-3.18688	-2.83977	-1.99207
140258	KRTAP13-1	-1.13593	-1.41472	-2.85812
285144	LOC285144	-4.6469	-3.38588	-5.35162
728987	LOC728987	-1.20064	-2.20099	-2.85254
283674	LOC283674	-3.86668	-1.51019	-2.33381
3491	CYR61	-2.00441	-4.05196	-3.11699
3398	ID2	-7.00206	-2.66353	-1.18448
51421	AMOTL2	-1.52036	-1.33487	-1.91914
22943	DKK1	-2.06194	-1.52515	-5.87014
154	ADRB2	-1.92792	-2.02235	-3.37435
3606	IL18	-2.33159	-2.69689	-2.5089
28234	SLCO1B3	-1.17641	-1.49975	-2.77361
1907	EDN2	-2.28148	-1.813	-2.64592
8468	FKBP6	-2.38812	-1.4124	-3.0431
1187	CLCNKA	-1.96527	-1.75876	-1.60565
941	CD80	-1.79032	-1.93396	-2.20604
4153	MBL2	-2.55278	-1.36828	-1.56734
4616	GADD45B	-1.30348	-1.73151	-1.49133
3399	ID3	-5.71465	-2.03619	-3.26851
3860	KRT13	-4.16681	-4.26605	-1.40449
3397	ID1	-3.10341	-2.32984	-1.8815
1490	CTGF	-3.32359	-8.95368	-2.45642
25878	MXRA5	-1.35097	-1.46923	-1.93535
361	AQP4	-1.15953	-2.41931	-1.43897
5132	PDC	-1.49468	-3.04606	-1.80669
25924	MYRIP	-2.55577	-3.49989	-1.249
25893	TRIM58	-3.79789	-1.0482	-2.70978
5897	RAG2	-4.02083	-1.13735	-3.43321
6967	TRGC2	-3.08051	-1.27457	-1.10046
727842	LOC727842	-1.00183	-4.17983	-4.24171
22899	ARHGEF15	-3.18824	-1.52467	-1.78946
50506	DUOX2	-3.23553	-1.58464	-1.39693
56033	BARX1	-1.0348	-2.48292	-2.48396
79729	C1orf113	-1.28398	-1.68404	-1.81457
80117	ARL14	-1.2995	-3.91561	-5.31037
57105	CYSLTR2	-1.3288	-2.96288	-1.95237
728621	RP4-692D3.1	-3.20965	-2.19332	-1.2872
84075	FSCB	-4.57098	-4.40841	-4.65176
84648	LCE3D	-1.4412	-1.72427	-1.39223
56961	SHD	-1.77959	-1.62474	-2.90044
196500	C12orf53	-3.29845	-2.4694	-2.55166
730031	LOC730031	-1.26741	-1.36404	-1.14122
144501	KRT80	-2.5684	-1.30611	-2.77292
286126	LOC286126	-3.52177	-5.1529	-2.74356
84631	SLITRK2	-2.16701	-3.04597	-2.59776
1081	CGA	-1.06961	-4.24267	-1.57568
390063	OR51I1	-1.70812	-1.60696	-1.14431
138255	C9orf135	-2.98733	-2.41693	-2.11061
283078	MKX	-2.31689	-3.65204	-1.4998
343171	OR2W3	-1.55383	-2.73994	-1.53892
145978	TMEM83	4.45876	2.49292	1.21558
388882	LOC388882	2.71617	1.4049	3.36086
133396	IL31RA	3.57146	1.66451	1.88129
283726	FAM154B	4.56631	2.74788	1.33776
118611	C10orf90	1.19976	1.13905	1.9414
441171	C6orf217	1.21802	2.1673	2.072
339468	LOC339468	1.07215	2.03778	2.56723
146443	LOC146443	1.07442	2.63368	2.96839
339896	GADL1	1.31761	1.56314	1.4793
6344	SCTR	2.90696	2.36706	3.24226
2272	FHIT	1.21645	1.46034	1.164
400655	LOC400655	1.59211	2.65612	3.93977
629	CFB	1.99639	5.56474	2.44554
6695	SPOCK1	1.24445	1.66548	1.37841
991	CDC20	5.23886	4.27953	1.56644
1520	CTSS	2.36139	1.26244	1.9159
3434	IFIT1	2.44133	2.22003	1.81059
9435	CHST2	2.53471	1.53781	2.28826
2791	GNG11	1.22659	4.49837	1.45805
8424	BBOX1	2.41258	2.5257	2.09183
140462	ASB9	1.07874	3.01245	1.27088
6283	S100A12	1.13891	3.80913	2.35479
6278	S100A7	1.42372	5.65225	8.74198
1393	CRHBP	8.33127	4.1461	2.28688
4223	MEOX2	1.12742	1.41145	4.37695
57016	AKR1B10	1.98794	1.90001	3.56295
1134	CHRNA1	1.24529	2.11058	2.99361
6014	RIT2	4.22739	1.48665	2.99836
80108	ZFP2	1.01531	2.02253	3.89615
4094	MAF	3.88566	1.42554	2.66664
5251	PHEX	1.66614	1.0296	1.39615
57205	ATP10D	1.50128	3.71165	1.16873
915	CD3D	1.34411	1.03086	1.63507
8347	HIST1H2BC	2.01132	1.16188	1.1524
23251	KIAA1024	2.15486	3.06999	2.14722
11037	STON1	1.25756	1.25442	2.23988
3078	CFHR1	1.23437	1.35133	1.34076
58189	WFDC1	2.5758	1.10159	3.05598
474344	GIMAP6	3.35937	2.95695	5.57735
11182	SLC2A6	1.70381	2.44137	1.1343
50617	ATP6V0A4	1.34949	1.16318	2.70736
80231	CXorf21	1.31901	2.3345	1.30493
9227	LRAT	2.22901	1.88114	2.93797
51297	PLUNC	1.92144	3.20598	2.14495
2018	EMX2	3.0869	1.01935	2.78572
353189	SLCO4C1	1.11701	2.30665	3.3337
59277	NTN4	1.01153	2.37114	1.11316
83733	SLC25A18	3.77599	1.17551	5.51407
57526	PCDH19	5.84455	2.09758	1.58039
27151	CPAMD8	1.55635	1.43219	1.60792
167838	TXLNB	3.81562	1.96053	1.1583
283788	LOC283788	1.68839	2.69849	1.27154
116441	TM4SF18	4.35043	3.95484	2.84177
222008	VSTM2A	5.02815	1.44376	1.45945
25766	PRPF40B	1.14031	2.1351	1.29466
197135	PATL2	4.62075	2.02236	1.25562
148696	LOC148696	2.48205	1.6085	3.79404
57622	LRFN1	1.00816	1.23622	1.43781
79825	CCDC48	4.10495	2.43251	2.94726
5592	PRKG1	1.15169	2.74224	2.5093
441733	PRKXP1	5.01066	3.82543	4.47664
6540	SLC6A13	1.05433	2.44806	1.92346
145376	C14orf50	2.77145	1.14821	1.84312
84929	FIBCD1	5.14152	1.343	2.83918
440981	LOC440981	4.48646	3.33192	4.24265
642398	LOC642398	1.18302	1.74817	1.10827
6559	SLC12A3	1.23989	1.77074	2.08045
