# Supplementary material for: Ovarian and Breast Cancer Spheres Are Similar in Transcriptomic Features and Sensitive to Fenretinide
Source: Biomed Res Int. 2013 Oct 8;2013:510905. doi: 10.1155/2013/510905 (PMC3816214; doi:10.1155/2013/510905)
Supplement: Supplementary file 1 — Total RNA from A2780, MCF7, and SUM159 parental and sphere cells was amplified and labeled with biotin according to the standard Affymetrix® protocol. The fragmented, biotinylated cDNA was then subjected to hybridization with the GeneChip® Human Genome-U133 Plus 2.0 array (Affymetrix, Santa Clara, CA). DAVID Bioinformatics Resources analyses of biological themes were performed to explore the underlying themes of those statistically significant differentially expressed genes in terms of biological relevance, e.g., functional relevance as revealed by Gene Ontology (GO) enrichment analysis and regulatory relevance as revealed by UCSC conserved transcription factor binding site (TFBS) enrichment analysis. The Benjamini-Hochberg derived step-up procedure of False Discovery Rate (FDR) was applied to account for multiple hypothesis testing, thus to assess the significance of the biological theme enrichments. The transcriptome profilings of A2780, MCF7, and SUM159 parental and sphere cells are available at GEO accession GSE43657. Table S1.The common regulated genes in A2780, MCF7 and SUM159 spheres cells. Table S2. The enriched transcription factors from the changed genes in A2780 spheres cells. Table S3. The enriched transcription factors from the changed genes in MCF7 spheres cells. Table S4. The enriched transcription factors from the changed genes in SUM159 spheres cells. [file 510905.f1.zip › 510905.f1/Table S2.xls]

## Sheet: Sheet1
Table S2 The enriched transcription factors from the changed genes in A2780 spheres cells
Term	Count	%	PValue
CHX10	928	4.86781	1.34748e-13
S8	979	5.13533	1.78122e-10
LHX3	807	4.23311	2.35942e-10
NFKAPPAB65	502	2.63324	1.35304e-09
FREAC2	707	3.70856	3.27205e-09
FOXD3	730	3.82921	7.68185e-08
NF1	788	4.13345	3.22532e-07
STAT5B	702	3.68233	4.09867e-07
POU6F1	888	4.65799	6.04009e-07
STAT	745	3.90789	6.07788e-07
HNF3B	855	4.48489	7.86807e-07
AP1	1231	6.4572	1.13664e-06
TAL1BETAE47	617	3.23647	2.49395e-06
BACH2	893	4.68422	3.57593e-06
TGIF	875	4.5898	3.6945e-06
TBP	738	3.87117	4.33474e-06
RP58	1066	5.59169	5.51165e-06
FREAC7	994	5.21402	5.61567e-06
RSRFC4	964	5.05665	6.97328e-06
GFI1	913	4.78913	8.56352e-06
CEBPA	603	3.16303	8.70923e-06
CREBP1CJUN	294	1.54217	9.16866e-06
PBX1	1162	6.09526	2.31545e-05
IK2	627	3.28892	2.3489e-05
GCNF	1160	6.08477	2.52582e-05
HSF2	856	4.49014	2.63948e-05
BACH1	1020	5.3504	3.23688e-05
HNF1	1125	5.90117	3.4329e-05
GATA	911	4.77864	3.58629e-05
E47	1234	6.47293	3.62671e-05
USF	1188	6.23164	4.20587e-05
OCT	940	4.93076	4.32161e-05
SRY	855	4.48489	4.53324e-05
CREL	354	1.8569	4.63727e-05
RORA1	909	4.76815	5.26913e-05
E4BP4	881	4.62128	6.95363e-05
HSF1	628	3.29417	7.24838e-05
MYOD	1128	5.91691	9.77216e-05
IK3	900	4.72094	0.000109071
HFH3	826	4.33277	0.000128441
OLF1	916	4.80487	0.000137264
ISRE	888	4.65799	0.000160114
NKX61	877	4.60029	0.000174787
NFKAPPAB	721	3.782	0.000174995
TAL1BETAITF2	1081	5.67037	0.000198692
SOX9	892	4.67898	0.000227014
TST1	889	4.66324	0.000247849
EGR2	195	1.02287	0.000364326
GATA6	352	1.84641	0.00038585
SOX5	962	5.04616	0.000424546
RORA2	948	4.97272	0.000431391
IRF7	905	4.74717	0.000491552
NFE2	717	3.76102	0.000504326
FREAC4	922	4.83634	0.000512045
IRF2	821	4.30655	0.000528952
FREAC3	857	4.49538	0.000565348
IRF1	519	2.72241	0.000578853
FOXO1	830	4.35376	0.00059716
STAT5A	1146	6.01133	0.000737795
HAND1E47	927	4.86257	0.000800743
ARP1	948	4.97272	0.000883454
IK1	712	3.73479	0.000990039
LYF1	780	4.09148	0.0012348
FOXO3	558	2.92698	0.00134915
MEIS1BHOXA9	1000	5.24549	0.00137468
NFAT	826	4.33277	0.00158648
FOXO4	1075	5.6389	0.00164454
SEF1	1009	5.2927	0.0016614
HNF4	954	5.0042	0.00178489
MAX	358	1.87789	0.00188228
ER	1010	5.29794	0.00201087
GR	1029	5.39761	0.00270173
MEF2	1472	7.72136	0.00286263
GATA3	473	2.48112	0.00297068
COUP	825	4.32753	0.0031277
HLF	800	4.19639	0.00337716
MEIS1AHOXA9	692	3.62988	0.00398663
BRN2	988	5.18254	0.00426632
TAL1ALPHAE47	413	2.16639	0.00429229
LMO2COM	1161	6.09001	0.00434518
HEN1	1155	6.05854	0.00479512
MYOGNF1	931	4.88355	0.00511505
TATA	1061	5.56546	0.00511657
NKX25	1252	6.56735	0.00555632
ZIC3	761	3.99182	0.00566235
CDC5	880	4.61603	0.00577861
CREBP1	929	4.87306	0.00593817
NKX22	875	4.5898	0.00606186
CDP	1181	6.19492	0.00659955
MEIS1	915	4.79962	0.00694842
HOX13	893	4.68422	0.00746201
CDPCR1	767	4.02329	0.00767917
TCF11MAFG	1031	5.4081	0.00844578
AP2REP	878	4.60554	0.00881017
HMX1	896	4.69996	0.00921302
NFKB	975	5.11435	0.00952914
MYCMAX	1230	6.45195	0.0100455
CART1	928	4.86781	0.0102629
PPARA	1066	5.59169	0.0109756
HFH1	880	4.61603	0.0111332
FAC1	932	4.8888	0.012331
ROAZ	891	4.67373	0.012921
OCT	1757	9.21632	0.0140792
PAX4	1532	8.03609	0.0150675
CEBPB	1078	5.65464	0.0172492
HOXA3	806	4.22786	0.0175006
STAT3	920	4.82585	0.019905
XBP1	964	5.05665	0.0202673
NFKAPPAB50	441	2.31326	0.0207753
AP4	1257	6.59358	0.0265973
POU3F2	1148	6.02182	0.0291557
SREBP1	1174	6.1582	0.0301593
MZF1	940	4.93076	0.0305525
FOXJ2	1277	6.69849	0.0342891
AP2GAMMA	213	1.11729	0.0359986
CDPCR3HD	862	4.52161	0.046011
BRACH	1067	5.59694	0.046111
CP2	758	3.97608	0.0474673
LUN1	963	5.05141	0.0475086
ARNT	914	4.79438	0.048457
PAX2	1133	5.94314	0.0515097
RFX1	1192	6.25262	0.0535648
MRF2	977	5.12484	0.0564624
COMP1	956	5.01469	0.0635483
AP1FJ	569	2.98468	0.0713921
EN1	1029	5.39761	0.0720539
NRSF	1030	5.40285	0.0757284
ZID	910	4.77339	0.0771755
CEBP	1494	7.83676	0.0772881
AML1	1509	7.91544	0.0779337
MAZR	407	2.13491	0.0807933
EVI1	1595	8.36655	0.0812815
CDPCR3	1048	5.49727	0.0814755
MIF1	806	4.22786	0.0874436
TAXCREB	1038	5.44482	0.0923959
MSX1	795	4.17016	0.0927329
HTF	1027	5.38712	0.0959741
ATF6	875	4.5898	0.0988831
