# Supplementary material for: Ovarian and Breast Cancer Spheres Are Similar in Transcriptomic Features and Sensitive to Fenretinide
Source: Biomed Res Int. 2013 Oct 8;2013:510905. doi: 10.1155/2013/510905 (PMC3816214; doi:10.1155/2013/510905)
Supplement: Supplementary file 1 — Total RNA from A2780, MCF7, and SUM159 parental and sphere cells was amplified and labeled with biotin according to the standard Affymetrix® protocol. The fragmented, biotinylated cDNA was then subjected to hybridization with the GeneChip® Human Genome-U133 Plus 2.0 array (Affymetrix, Santa Clara, CA). DAVID Bioinformatics Resources analyses of biological themes were performed to explore the underlying themes of those statistically significant differentially expressed genes in terms of biological relevance, e.g., functional relevance as revealed by Gene Ontology (GO) enrichment analysis and regulatory relevance as revealed by UCSC conserved transcription factor binding site (TFBS) enrichment analysis. The Benjamini-Hochberg derived step-up procedure of False Discovery Rate (FDR) was applied to account for multiple hypothesis testing, thus to assess the significance of the biological theme enrichments. The transcriptome profilings of A2780, MCF7, and SUM159 parental and sphere cells are available at GEO accession GSE43657. Table S1.The common regulated genes in A2780, MCF7 and SUM159 spheres cells. Table S2. The enriched transcription factors from the changed genes in A2780 spheres cells. Table S3. The enriched transcription factors from the changed genes in MCF7 spheres cells. Table S4. The enriched transcription factors from the changed genes in SUM159 spheres cells. [file 510905.f1.zip › 510905.f1/Table S3.xls]

## Sheet: Sheet1
Table S3 The enriched transcription factors from the changed genes in MCF7 spheres cells
Term	Count	%	PValue
LHX3	738	4.37256	6.8854e-16
S8	861	5.10132	8.64479e-12
TBP	681	4.03484	4.05557e-11
FOXD3	659	3.90449	5.08704e-11
POU6F1	803	4.75767	5.86483e-11
HLF	753	4.46143	3.6195e-09
CHX10	778	4.60955	4.72417e-09
STAT5B	624	3.69712	9.33029e-09
STAT	661	3.91634	1.60311e-08
HFH3	751	4.44958	2.94113e-08
HNF3B	755	4.47328	2.97782e-08
TATA	974	5.77083	3.97989e-08
AP1	1077	6.38109	6.43682e-08
CDC5	813	4.81692	1.53376e-07
FREAC3	774	4.58585	5.94987e-07
MEF2	1309	7.75566	8.25715e-07
FOXO1	748	4.4318	1.19144e-06
FREAC4	827	4.89987	1.20802e-06
SRY	757	4.48513	1.32975e-06
BACH2	778	4.60955	1.68201e-06
GATA	802	4.75175	2.17442e-06
E4BP4	779	4.61548	2.25666e-06
RSRFC4	840	4.97689	2.60129e-06
FOXO3	510	3.02169	4.10986e-06
IK1	643	3.80969	4.20775e-06
OCT	825	4.88802	4.58997e-06
MEIS1AHOXA9	633	3.75044	4.7558e-06
CEBPA	527	3.12241	4.86938e-06
FOXO4	959	5.68195	5.31448e-06
NKX61	776	4.5977	5.34815e-06
POU3F2	1040	6.16187	7.28698e-06
TGIF	755	4.47328	9.88072e-06
CART1	841	4.98282	1.09023e-05
FREAC2	587	3.4779	1.13858e-05
GFI1	790	4.68065	1.27483e-05
IRF2	728	4.31331	1.87199e-05
RORA1	792	4.6925	2.06322e-05
MEIS1BHOXA9	886	5.24944	2.65097e-05
FREAC7	853	5.05392	3.58181e-05
NKX25	1108	6.56476	4.69747e-05
GATA6	313	1.85449	7.23557e-05
SOX5	841	4.98282	8.47759e-05
FOXJ2	1140	6.75435	8.82223e-05
BACH1	877	5.19611	0.000113255
HNF1	967	5.72935	0.00012305
IRF7	790	4.68065	0.000140775
RORA2	823	4.87617	0.000263425
CEBP	1324	7.84453	0.000370442
IRF1	452	2.67804	0.000444159
TAL1BETAE47	514	3.04538	0.000499123
NFKAPPAB	617	3.65565	0.000824202
HSF2	724	4.28961	0.000889914
BRN2	863	5.11317	0.000975352
ISRE	759	4.49698	0.000983784
NKX3A	800	4.7399	0.00100012
HFH1	775	4.59178	0.00132331
E47	1046	6.19742	0.00158138
IK3	764	4.5266	0.00175331
COUP	717	4.24813	0.00175518
HSF1	529	3.13426	0.00177951
CDP	1028	6.09077	0.001783
RP58	892	5.28499	0.00205873
SOX9	759	4.49698	0.00222993
TAL1BETAITF2	920	5.45088	0.002401
MSX1	714	4.23036	0.00267203
CREBP1	808	4.7873	0.00277589
HAND1E47	794	4.70435	0.00281333
PBX1	978	5.79453	0.00293174
NFKB	850	5.03614	0.00309174
NF1	641	3.79784	0.00326947
LYF1	668	3.95781	0.00362273
NFAT	708	4.19481	0.0045445
LMO2COM	1001	5.9308	0.00492689
MAX	306	1.81301	0.00549822
CEBPB	938	5.55753	0.00593972
IK2	515	3.05131	0.00774586
NKX22	754	4.46735	0.00796254
NFKAPPAB65	379	2.24553	0.0109784
BRACH	932	5.52198	0.0112899
TST1	745	4.41403	0.0123587
EVI1	1388	8.22372	0.012821
CHOP	810	4.79915	0.0154596
TAL1ALPHAE47	349	2.06778	0.0206023
STAT5A	966	5.72343	0.0217705
EN1	893	5.29091	0.0411601
STAT3	787	4.66287	0.043819
MYCMAX	1047	6.20334	0.0494046
2013-10-01	1502	8.89916	0.0593762
PAX3	723	4.28368	0.061718
EGR2	150	0.888731	0.0642594
COMP1	824	4.8821	0.0646538
OLF1	749	4.43773	0.074153
TCF11MAFG	869	5.14871	0.0807691
PAX2	971	5.75305	0.0820855
MRF2	838	4.96504	0.0837826
STAT1	654	3.87487	0.0851448
GATA1	1358	8.04598	0.0935692
