# Supplementary material for: Ovarian and Breast Cancer Spheres Are Similar in Transcriptomic Features and Sensitive to Fenretinide
Source: Biomed Res Int. 2013 Oct 8;2013:510905. doi: 10.1155/2013/510905 (PMC3816214; doi:10.1155/2013/510905)
Supplement: Supplementary file 1 — Total RNA from A2780, MCF7, and SUM159 parental and sphere cells was amplified and labeled with biotin according to the standard Affymetrix® protocol. The fragmented, biotinylated cDNA was then subjected to hybridization with the GeneChip® Human Genome-U133 Plus 2.0 array (Affymetrix, Santa Clara, CA). DAVID Bioinformatics Resources analyses of biological themes were performed to explore the underlying themes of those statistically significant differentially expressed genes in terms of biological relevance, e.g., functional relevance as revealed by Gene Ontology (GO) enrichment analysis and regulatory relevance as revealed by UCSC conserved transcription factor binding site (TFBS) enrichment analysis. The Benjamini-Hochberg derived step-up procedure of False Discovery Rate (FDR) was applied to account for multiple hypothesis testing, thus to assess the significance of the biological theme enrichments. The transcriptome profilings of A2780, MCF7, and SUM159 parental and sphere cells are available at GEO accession GSE43657. Table S1.The common regulated genes in A2780, MCF7 and SUM159 spheres cells. Table S2. The enriched transcription factors from the changed genes in A2780 spheres cells. Table S3. The enriched transcription factors from the changed genes in MCF7 spheres cells. Table S4. The enriched transcription factors from the changed genes in SUM159 spheres cells. [file 510905.f1.zip › 510905.f1/Table S4.xls]

## Sheet: Sheet1
Table S4 The enriched transcription factors from the changed genes in SUM159 spheres cells
Term	Count	%	PValue
CHX10	975	4.70537	3.18057e-16
S8	1045	5.04319	3.01309e-15
LHX3	835	4.02973	1.33573e-10
FOXD3	776	3.74499	1.4017e-10
FREAC2	736	3.55195	5.10382e-10
BACH2	951	4.58955	4.07401e-09
TBP	787	3.79808	9.55849e-09
STAT5B	739	3.56643	9.84213e-09
STAT	784	3.7836	1.52656e-08
RP58	1126	5.4341	2.40137e-08
HNF1	1196	5.77192	2.86567e-08
POU6F1	926	4.4689	7.9399e-08
AP1	1283	6.19179	1.09675e-07
FREAC7	1044	5.03837	1.49082e-07
POU3F2	1259	6.07596	2.19554e-07
SOX5	1033	4.98528	2.19913e-07
HFH3	884	4.2662	2.22005e-07
OCT	996	4.80672	2.66767e-07
FREAC3	924	4.45924	2.90268e-07
NKX61	934	4.5075	6.93991e-07
BACH1	1069	5.15902	1.79726e-06
TGIF	907	4.3772	2.05297e-06
IK3	950	4.58472	2.26768e-06
IRF1	561	2.7074	2.47168e-06
RORA2	1007	4.8598	2.86576e-06
NKX3A	988	4.76811	3.32067e-06
HNF3B	877	4.23242	3.3774e-06
HSF2	894	4.31446	3.8847e-06
NFKAPPAB65	491	2.36958	3.9131e-06
CDC5	953	4.5992	3.98165e-06
NF1	801	3.86564	6.1187e-06
SRY	893	4.30964	7.27675e-06
CREBP1CJUN	304	1.46711	7.37662e-06
FOXO4	1143	5.51614	7.892e-06
MEF2	1556	7.50929	8.92907e-06
NFKAPPAB	760	3.66778	9.06357e-06
SOX9	939	4.53163	1.01533e-05
NKX22	943	4.55094	1.13445e-05
FOXO1	879	4.24207	1.25995e-05
BRN2	1057	5.10111	1.32315e-05
NFKB	1050	5.06732	1.41706e-05
NFAT	881	4.25173	1.44646e-05
TAL1BETAITF2	1132	5.46306	1.60458e-05
CEBPA	620	2.99213	1.76922e-05
FOXJ2	1373	6.62613	1.88849e-05
FREAC4	969	4.67642	3.40602e-05
TST1	929	4.48337	4.26744e-05
E47	1275	6.15318	4.57821e-05
HAND1E47	973	4.69572	7.31375e-05
NFE2	751	3.62434	8.36128e-05
FOXO3	591	2.85218	9.62439e-05
PBX1	1193	5.75744	0.000117031
HFH1	941	4.54129	0.000119826
NKX25	1320	6.37035	0.000137402
BRACH	1148	5.54027	0.000144915
CEBP	1593	7.68785	0.000152281
ISRE	918	4.43029	0.000165343
GCNF	1189	5.73814	0.000168719
CART1	987	4.76328	0.000203526
HSF1	643	3.10313	0.000228425
GATA	931	4.49303	0.000242834
HLF	844	4.07316	0.000244673
MEIS1AHOXA9	732	3.53265	0.000297805
GATA3	501	2.41784	0.000320805
TAL1BETAE47	614	2.96318	0.000357499
CEBPB	1144	5.52097	0.000359635
IRF2	851	4.10694	0.000377559
MEIS1BHOXA9	1042	5.02871	0.000443088
PAX4	1608	7.76024	0.000608729
IRF7	933	4.50268	0.00078066
TAL1ALPHAE47	436	2.10415	0.00079592
E4BP4	894	4.31446	0.00117197
MIF1	870	4.19864	0.00121421
MYCMAX	1287	6.21109	0.00158578
COMP1	1020	4.92254	0.00185582
GFI1	913	4.40616	0.00189861
CDP	1231	5.94083	0.00203654
HOXA3	849	4.09729	0.00233169
IK2	623	3.00661	0.00235868
LUN1	1022	4.93219	0.00251602
RSRFC4	961	4.63781	0.00303834
RORA1	913	4.40616	0.003815
STAT5A	1174	5.66575	0.00387494
ZIC3	790	3.81256	0.00402142
FAC1	973	4.69572	0.00434761
GATA6	352	1.69876	0.00442951
IK1	726	3.50369	0.00458819
COUP	848	4.09247	0.00614095
AP2REP	910	4.39168	0.0071438
EN1	1087	5.24589	0.00781085
TATA	1094	5.27967	0.00805886
TCF11MAFG	1067	5.14937	0.00810216
ZID	962	4.64263	0.0100708
2013-10-01	1821	8.78819	0.0106132
MSX1	843	4.06834	0.0111241
GR	1053	5.0818	0.0117018
CDPCR1	789	3.80773	0.0135243
EVI1	1667	8.04498	0.0152339
CREL	337	1.62637	0.0167689
MYB	911	4.39651	0.0185524
NCX	903	4.3579	0.0200713
EGR2	185	0.892814	0.0210594
MYOD	1128	5.44375	0.0222542
LYF1	785	3.78843	0.0227847
MAX	355	1.71324	0.023198
PPARA	1096	5.28932	0.0260838
MEIS1	935	4.51233	0.0265535
CREBP1	946	4.56542	0.0341157
LMO2COM	1182	5.70436	0.0394202
STAT1	793	3.82704	0.0403456
AP1FJ	593	2.86183	0.0454065
SREBP1	1211	5.84431	0.046087
RFX1	1235	5.96014	0.047595
ROAZ	909	4.38685	0.0516428
PAX2	1172	5.6561	0.0533422
SRF	1420	6.85295	0.0543239
ER	1016	4.90324	0.0558347
NFKAPPAB50	448	2.16206	0.0565386
MRF2	1011	4.87911	0.0569759
HNF4	957	4.6185	0.0590105
PPARG	1660	8.0112	0.0615199
OLF1	901	4.34825	0.0615674
GATA1	1637	7.9002	0.0702374
HMX1	907	4.3772	0.0722555
CP2	780	3.7643	0.0748919
EGR3	336	1.62154	0.087963
PAX6	1076	5.1928	0.0936413
USF	1169	5.64162	0.0992367
